# Supplementary material
Source: Springer Nature journal article supplement (https://www.springermedizin.de/resource/supplementary/12913_2013_3027_MOESM2_ESM.pdf/9533366)
Supplement: MOESM2 [file 9533366]

**Table 2: Provider characteristics**

|                                 | <b>Mentees<br/>(N=23)</b> | <b>Mentors<br/>(N=12)</b> | <b>Total</b> |
|---------------------------------|---------------------------|---------------------------|--------------|
| <b>Position</b>                 | <b>n</b>                  | <b>n</b>                  | <b>N</b>     |
| <b>Enrolled nurse/midwife</b>   | 7                         | 5                         | 12           |
| <b>Registered nurse/midwife</b> | 12                        | 5                         | 17           |
| <b>BSCN Nurse</b>               | 0                         | 1                         | 1            |
| <b>Clinical officer</b>         | 2                         | 0                         | 2            |
| <b>Other</b>                    | 2                         | 1                         | 3            |
| <b>Total</b>                    | <b>23</b>                 | <b>12</b>                 | <b>35</b>    |
| <b>Age</b>                      | <b>n</b>                  | <b>n</b>                  | <b>N</b>     |
| <b>&lt;=30 yrs</b>              | 5                         | 3                         | 8            |
| <b>31-35 yrs</b>                | 3                         | 4                         | 7            |
| <b>36-40 yrs</b>                | 1                         | 1                         | 2            |
| <b>41-45 yrs</b>                | 6                         | 3                         | 9            |
| <b>46-50 yrs</b>                | 6                         | 0                         | 6            |
| <b>&gt; 50 yrs</b>              | 2                         | 1                         | 3            |
| <b>Total</b>                    | <b>23</b>                 | <b>12</b>                 | <b>35</b>    |
| <b>Time in facility</b>         | <b>n</b>                  | <b>n</b>                  | <b>N</b>     |
| <b>&lt;1 yr</b>                 | 5                         | 4                         | 9            |
| <b>1-5 yrs</b>                  | 4                         | 2                         | 6            |
| <b>6-10 yrs</b>                 | 6                         | 2                         | 8            |
| <b>11-15 yrs</b>                | 0                         | 1                         | 1            |
| <b>16-20 yrs</b>                | 0                         | 0                         | 0            |
| <b>&gt; 20 yrs</b>              | 5                         | 1                         | 6            |
| <b>Total</b>                    | <b>20</b>                 | <b>10</b>                 | <b>30</b>    |
